# Supplementary material for: Are drivers of northern lights in the ionosphere?
Source: Copernicus journal article supplement (doi:10.5194/egusphere-2025-716), 2025-02-21
Supplement: Supplementary file [file egusphere-2025-716-AC1-supplement.pdf]

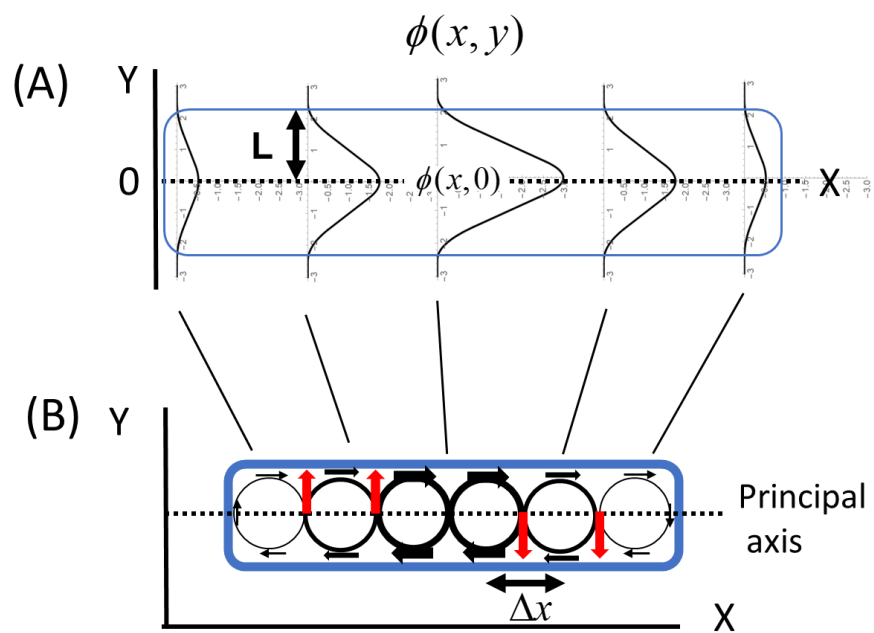

Figure a

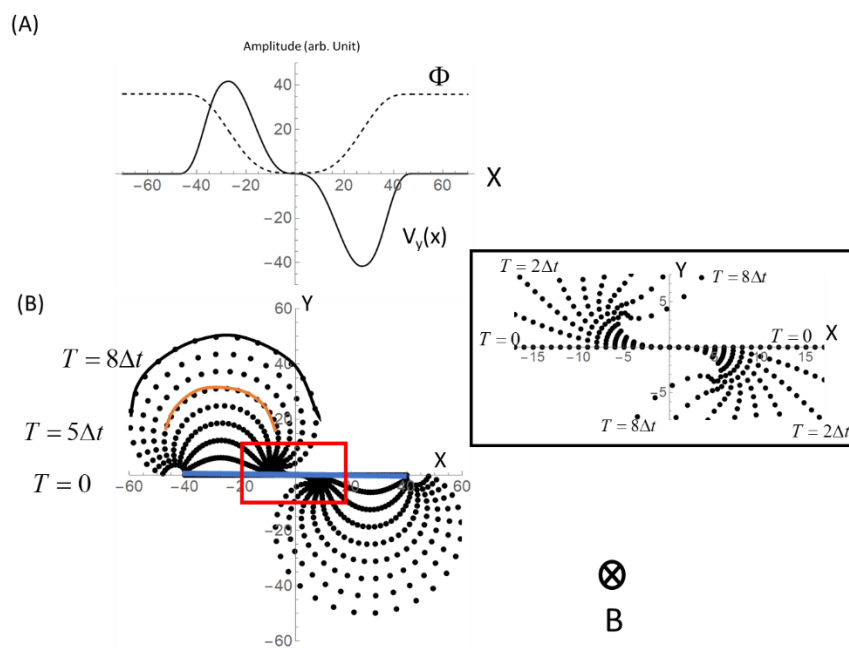

Figure b

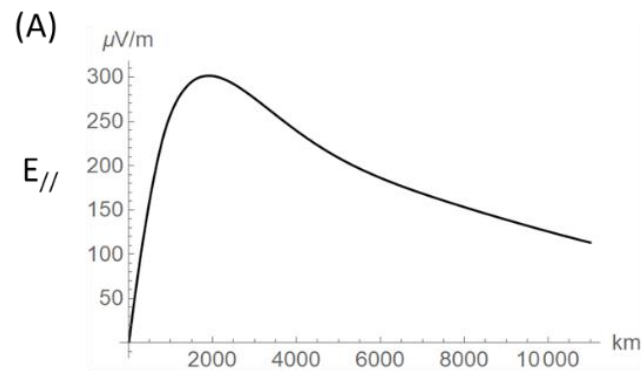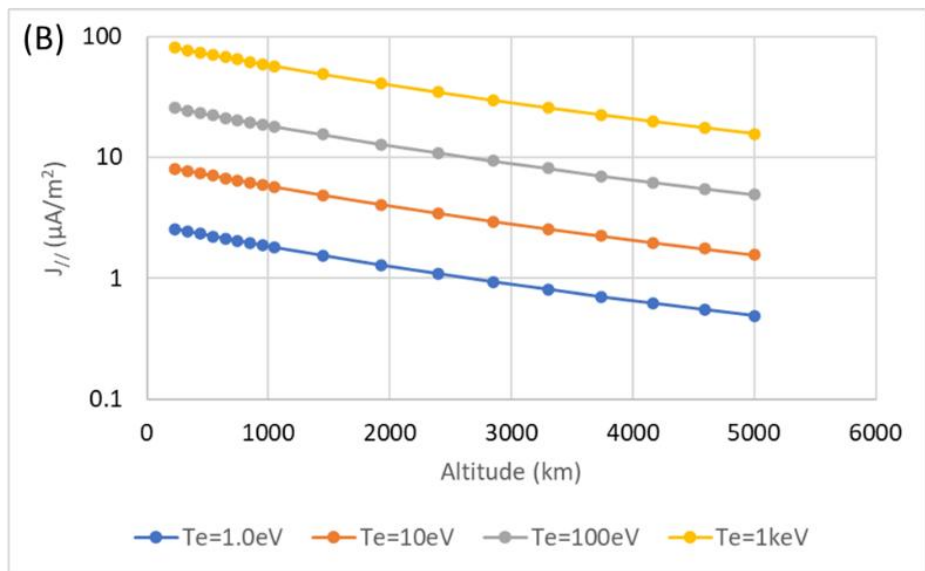

Figure c

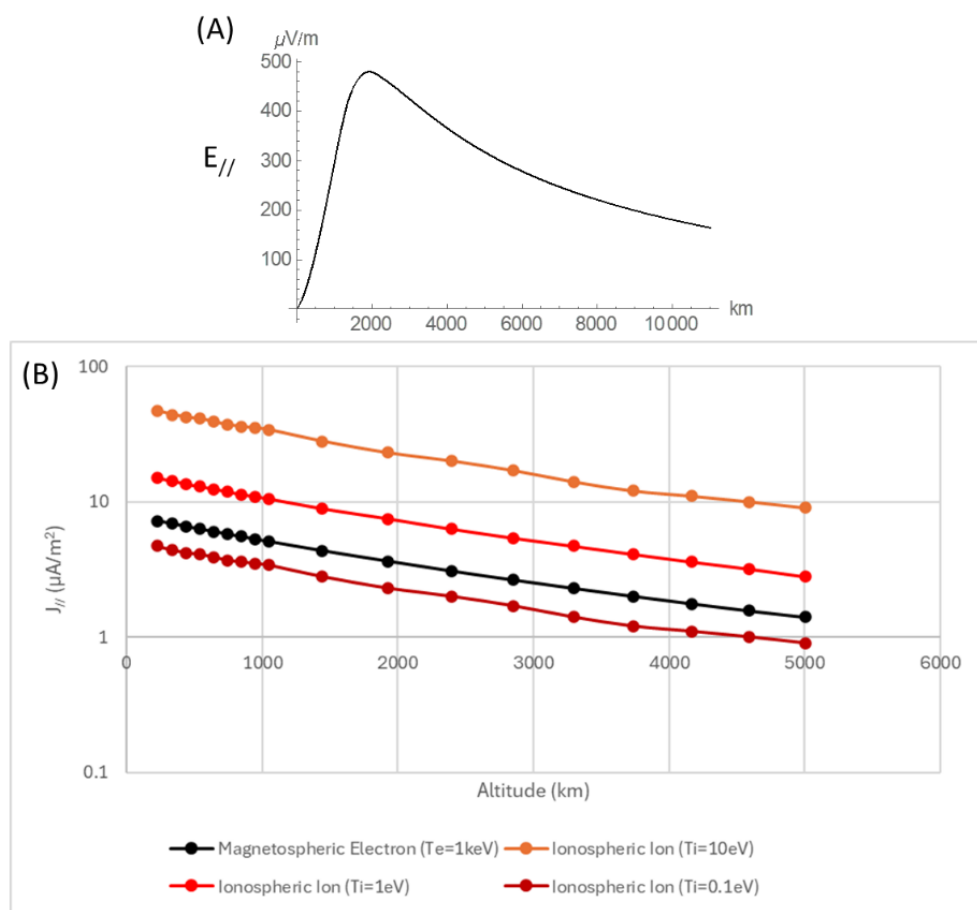

**Figure d**
